# Supplementary material for: Photocatalytic norfloxacin degradation enabled by a dual S-scheme nanocellulose-based Ag2WO4/NiO/MoO3 tertiary heterojunction
Source: Royal Society of Chemistry journal article supplement (doi:10.1039/d4cy01243g), 2025-01-01
Supplement: d4cy01243g1.pdf [file d4cy01243g1.pdf]

**Photocatalytic norfloxacin degradation enabled by dual S-scheme nanocellulose-based  
 $\text{Ag}_2\text{WO}_4/\text{NiO}/\text{MoO}_3$  tertiary heterojunction**

Shabnam Sambyal<sup>a</sup>, Vinay Chauhan<sup>a</sup>, Pooja Shandilya<sup>b,d,\*</sup>, Aashish Priye<sup>b,c,\*</sup>

<sup>a</sup>*School of Advanced Chemical Sciences, Shoolini University, Solan, HP 173229, India*

<sup>b</sup>*Department of Chemical and Environmental Engineering, University of Cincinnati,  
Cincinnati, OH 45221, USA*

<sup>c</sup>*Digital Futures, University of Cincinnati, Cincinnati, OH 45221, USA*

<sup>d</sup>*Department of Chemistry, MMEC, Maharishi Markandeshwar (Deemed to be University),  
Mullana-Ambala, Haryana 133207, India*

*\*Corresponding Authors: Aashish Priye and Pooja Shandilya*

*E-mail: [priyeah@ucmail.uc.edu](mailto:priyeah@ucmail.uc.edu) and [shandipj@ucmail.uc.edu](mailto:shandipj@ucmail.uc.edu)*

**Table S1:** Previous reports on nanocellulose, Ag<sub>2</sub>WO<sub>4</sub>, NiO and MoO<sub>3</sub> based heterojunction for photodegradation application.

| Photocatalyst                                                                                    | Pollutants                                      | Photodegradation efficiency<br>(In %) | Irradiation time<br>(In min) | Migration | Recyclability | References |
|--------------------------------------------------------------------------------------------------|-------------------------------------------------|---------------------------------------|------------------------------|-----------|---------------|------------|
| ZnTiO <sub>3</sub> -nanocellulose                                                                | Tetrahydrochloride                              | 98.27                                 | 120                          | -         | 5             | [1]        |
| Cellulose/ $\gamma$ -Fe <sub>2</sub> O <sub>3</sub> -ZrO <sub>2</sub>                            | Congo Red                                       | 98.5                                  | 35                           | Type-II   | 4             | [2]        |
| MrGO/Ag <sub>2</sub> WO <sub>4</sub>                                                             | Lomefloxacin<br>degradation                     | 93.62                                 | 120                          | Z-scheme  | 4             | [3]        |
| Ag <sub>2</sub> WO <sub>4</sub> /ZIF-8                                                           | MB degradation                                  | 98.3                                  | 120                          | Z-scheme  | 5             | [4]        |
| Ag <sub>2</sub> WO <sub>4</sub> /BiOBr                                                           | Lanasol Red                                     | 98                                    | 15                           | Z-scheme  | 4             | [5]        |
| g-C <sub>3</sub> N <sub>4</sub> /Ag <sub>2</sub> WO <sub>4</sub> /Bi <sub>2</sub> S <sub>3</sub> | Congo Red                                       | 98                                    | 60                           | S-scheme  | 5             | [6]        |
| g-C <sub>3</sub> N <sub>4</sub> /BiOI/Ag <sub>2</sub> WO <sub>4</sub>                            | Sudan Red III                                   | 89                                    | 90                           | Z-scheme  | 5             | [7]        |
| NiO@Bi <sub>2</sub> MoO <sub>6</sub> -MoS <sub>2</sub>                                           | Indigo carmine                                  | 98.8                                  | 120                          | -         | 5             | [8]        |
| NiO/BiOI                                                                                         | Rhodamine B                                     | -                                     | -                            | S-scheme  | 5             | [9]        |
| NiO/BiOBr                                                                                        | Oxytetracycline and 2-<br>Mercaptobenzothiazole | 72.6 and 97.7                         | 120 and 9                    | Z-scheme  | 4             | [10]       |
| Bi <sub>2</sub> WO <sub>6</sub> /NiO                                                             | Ciprofloxacin                                   | 92.5                                  | 90                           | S-scheme  | -             | [11]       |

|                                                           |                                    |           |     |          |   |      |
|-----------------------------------------------------------|------------------------------------|-----------|-----|----------|---|------|
| 3D-Bi <sub>2</sub> MoO <sub>6</sub> @MoO <sub>3</sub> /PU | Oxytetracycline                    | 88.89     | 20  | Z-scheme | 9 | [12] |
| ZnIn <sub>2</sub> S <sub>4</sub> @MoO <sub>3</sub>        | Tetracycline<br>hydrochloride      | 99.2      | 90  | Z-scheme | 4 | [13] |
| ZnO/CuO/MoO <sub>3</sub>                                  | Rhodamine B and<br>alizarin yellow | 97 and 79 | 120 | Type-II  | 5 | [14] |

**Table S2:** Comparative analysis of contemporary literature in recent years regarding the photocatalytic efficiency of NFX.

| Photocatalyst                                   | Photocatalyst<br>Dosages<br>(In mg/L) | Pollutant<br>concentration<br>(In mg/L) | pH | Light source   | Reactive<br>species                                | Degradation<br>efficacy<br>(In %) | Time<br>(In min) | Cycles | References |
|-------------------------------------------------|---------------------------------------|-----------------------------------------|----|----------------|----------------------------------------------------|-----------------------------------|------------------|--------|------------|
| NiO                                             | 10                                    | 50                                      | 10 | Xe lamp        | $\cdot\text{OH}$ and $\text{h}^+$                  | -                                 | 40               | -      | [15]       |
| MoO <sub>3</sub>                                | 50                                    | 20                                      | -  | 300 W Xe lamp  | $\cdot\text{OH}$ and $\text{h}^+$                  | 100                               | 40               | 5      | [16]       |
| TiO <sub>2</sub>                                | 1000                                  | -                                       | 1  | Hg lamp        | -                                                  | -                                 | 80               | -      | [17]       |
| Mn:ZnS Quantum Dots                             | 60                                    | 15                                      | 10 | Hg lamp        | $\text{e}^-$ , $\text{O}_2^-$ and $\cdot\text{OH}$ | 86                                | 60               | 4      | [18]       |
| Ce-TiO <sub>2</sub> and B-TiO <sub>2</sub>      | 500 and 1000                          | 10                                      | 7  | Under sunlight | $\text{h}^+$ and $\text{e}^-$                      | 93                                | 180              | 5      | [19]       |
| Ag <sub>3</sub> PO <sub>4</sub> /graphene oxide | -                                     | 15                                      | -  | 250 W Xe lamp  | $\text{h}^+$ and $\text{O}_2^-$                    | 83.68                             | 100              | 4      | [20]       |

|                                                                                 |           |           |          |                     |                                                 |             |           |          |                     |
|---------------------------------------------------------------------------------|-----------|-----------|----------|---------------------|-------------------------------------------------|-------------|-----------|----------|---------------------|
| Bi <sub>2</sub> Sn <sub>2</sub> O <sub>7</sub> /g-C <sub>3</sub> N <sub>4</sub> | 20        | 20        | -        | 500 W Xe lamp       | e <sup>-</sup> and h <sup>+</sup>               | 94          | 3 h       | 5        | [21]                |
| LaOCl/LDH                                                                       | 20        | 10        | 7        | 300 W Xe lamp       | ·O <sub>2</sub> <sup>-</sup>                    | 90          | 150       | 3        | [22]                |
| ZnFe <sub>2</sub> O <sub>4</sub> /BiOBr                                         | -         | 50        | -        | 300 W Xe lamp       | h <sup>+</sup> and ·O <sub>2</sub> <sup>-</sup> | 91.70       | 60        | 5        | [23]                |
| NiWO <sub>4</sub> @g-C <sub>3</sub> N <sub>4</sub>                              | 50        | 10        | -        | W lamp              | ·OH and h <sup>+</sup>                          | 97          | 60        | 5        | [24]                |
| In <sub>2</sub> O <sub>3</sub> /TiO <sub>2</sub>                                | 30        | 20        | -        | 500 W Xe lamp       | ·OH                                             | 100         | 10        | 45       | [25]                |
| ZnO/ZnS                                                                         | 25        | 25        | 7        | UV lamp             | ·O <sub>2</sub> <sup>-</sup>                    | 95          | 3 h       | 5        | [26]                |
| NiO/ZnO                                                                         | 30        | 10 μM     | -        | W lamp              | ·O <sub>2</sub> <sup>-</sup> and h <sup>+</sup> | 96.73       | 80        | 5        | [27]                |
| GDQ-MoS <sub>2</sub> @Co <sub>3</sub> O <sub>4</sub>                            | 20        | 20        | 9        | 150 W Xe lamp       | e <sup>-</sup> and ·O <sub>2</sub> <sup>-</sup> | 99.3        | 90        | 4        | [28]                |
| <b>NC-ANM</b>                                                                   | <b>15</b> | <b>50</b> | <b>6</b> | <b>LED bulb 50W</b> | <b>·OH and ·O<sub>2</sub><sup>-</sup></b>       | <b>99.6</b> | <b>30</b> | <b>7</b> | <b>Present work</b> |

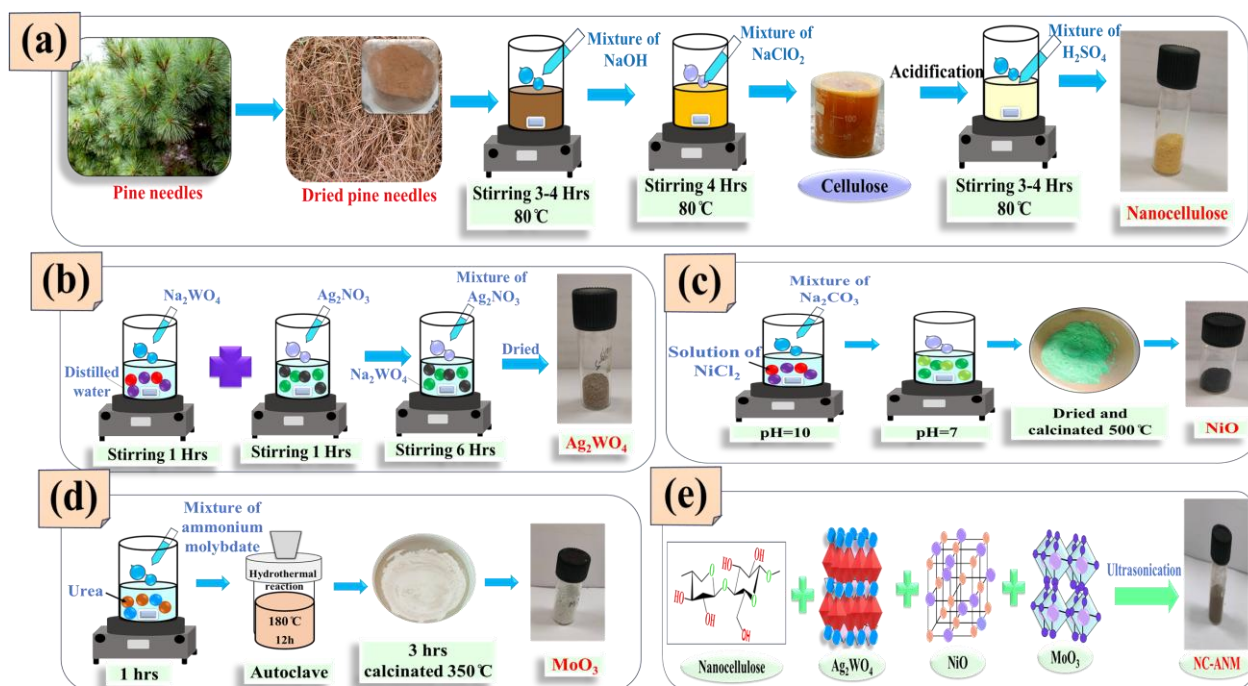

**Scheme 1.** Schematic diagram for the formation of (a) nanocellulose, (b) Ag<sub>2</sub>WO<sub>4</sub>, (c) NiO, (d) MoO<sub>3</sub>, and (e) NC-ANM heterojunction.

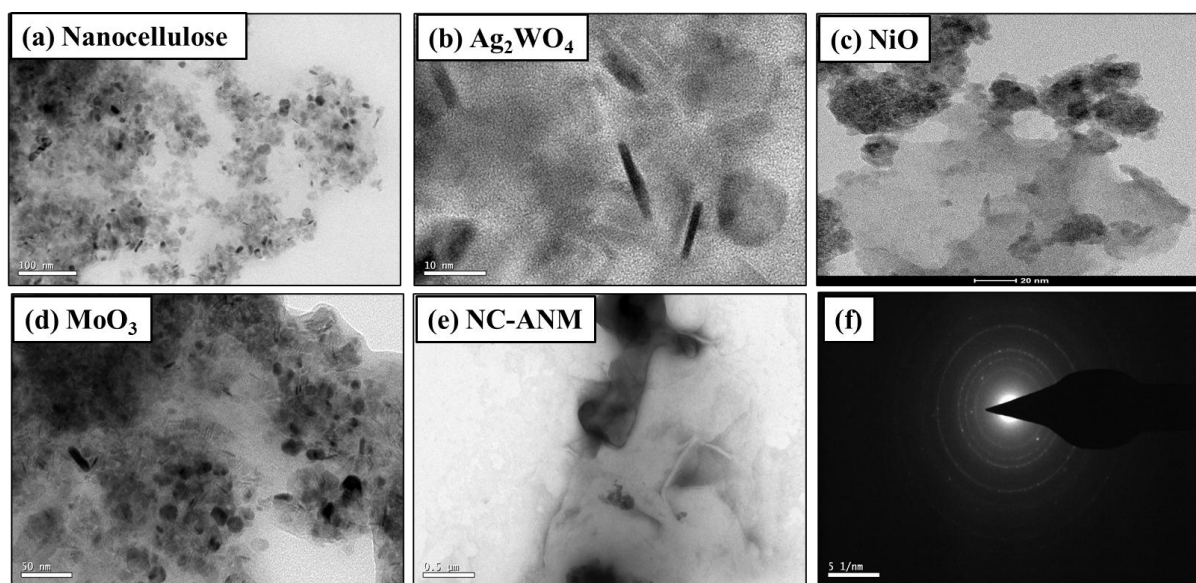

**Figure S1.** HRTEM result of (a) nanocellulose, (b) Ag<sub>2</sub>WO<sub>4</sub>, (c) NiO, (d) MoO<sub>3</sub>, (e) NC-ANM heterojunction, and (f) SAED pattern of NC-ANM. Nanocellulose, Ag<sub>2</sub>WO<sub>4</sub>, NiO, and MoO<sub>3</sub> are granular, irregular-size rods, block sheets, and rod-like morphology with size 10-50 nm and NC-ANM, indicating its polycrystalline nature.

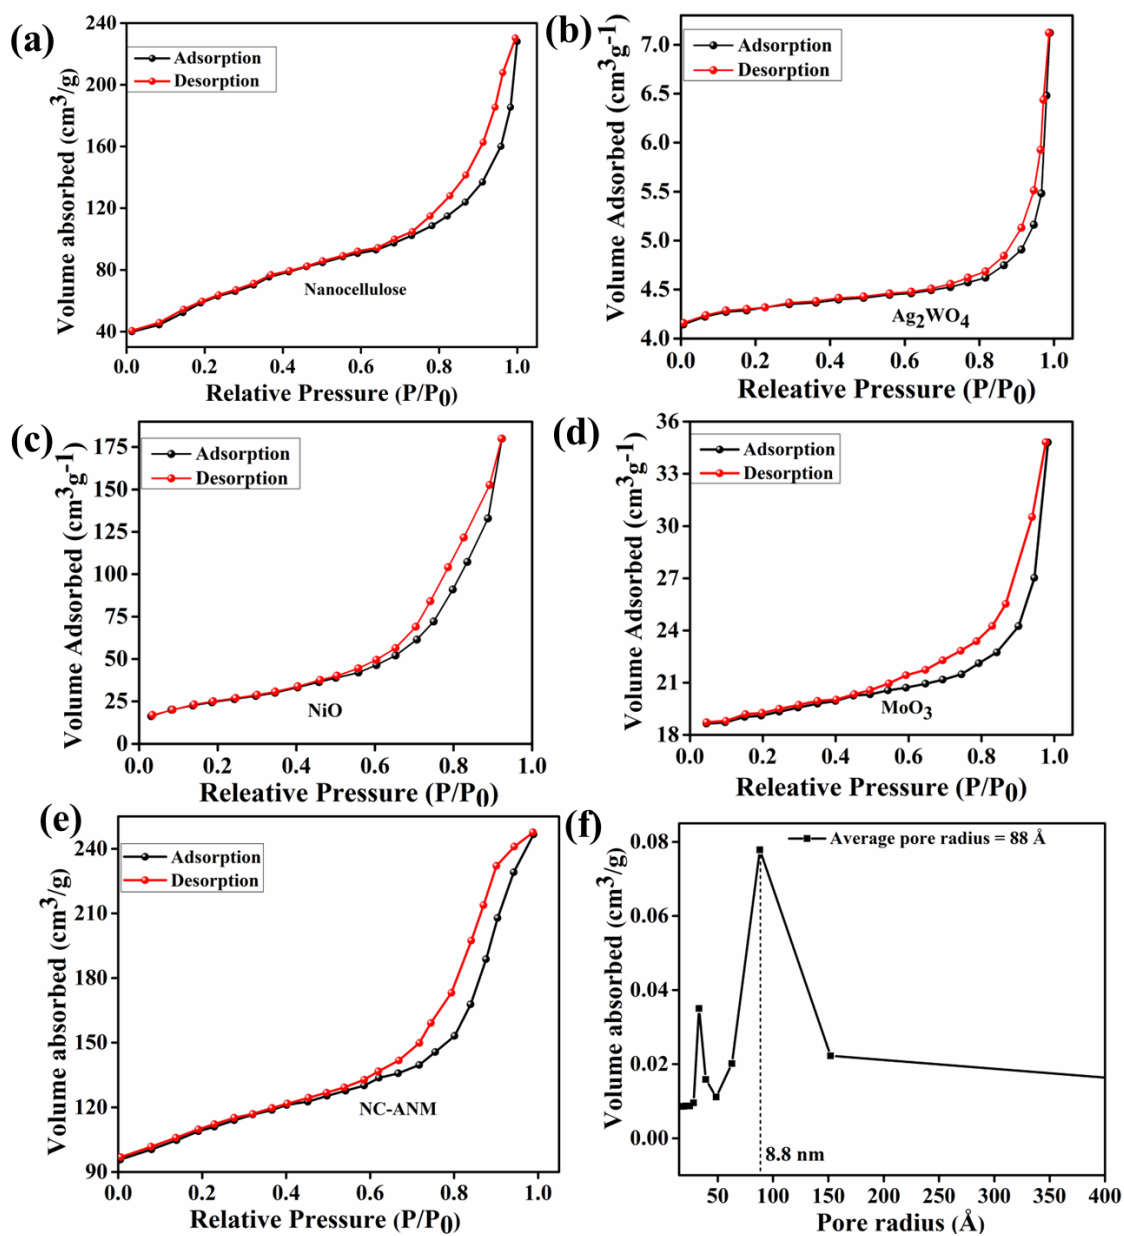

**Figure S2.** BET analysis of (a) nanocellulose, (b) Ag<sub>2</sub>WO<sub>4</sub>, (c) NiO, (d) MoO<sub>3</sub>, (e) NC-ANM heterojunction, and (f) pore size distribution of NC-ANM. N<sub>2</sub> adsorption-desorption isotherm and pore size distribution of the NC-ANM composite, revealing its mesoporous structure with a high surface area and a narrow pore size distribution, beneficial for photocatalytic applications.

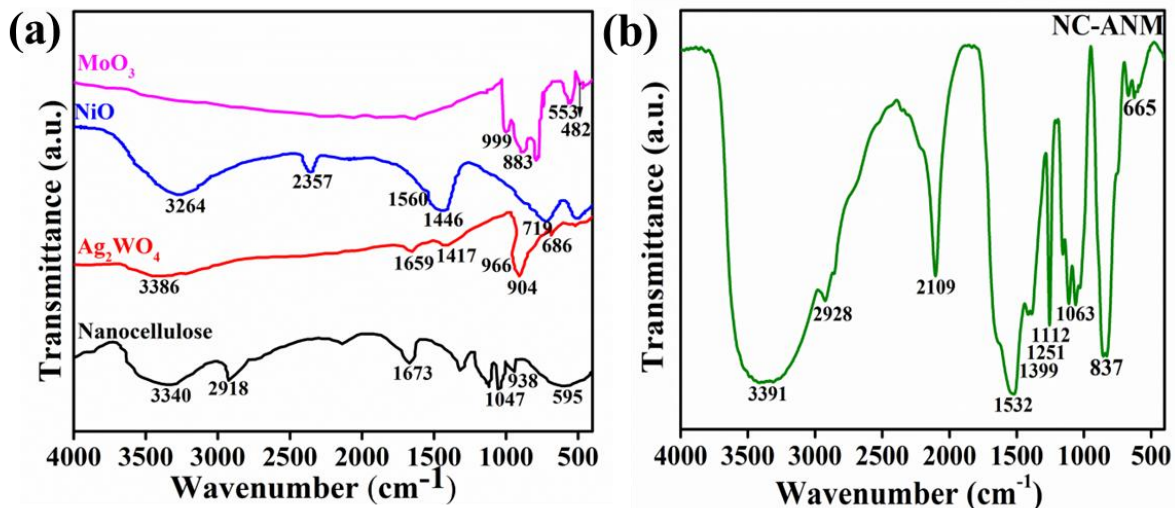

**Figure S3.** FTIR spectra of (a) nanocellulose,  $\text{Ag}_2\text{WO}_4$ , NiO,  $\text{MoO}_3$ , and (b) NC-ANM heterojunction.

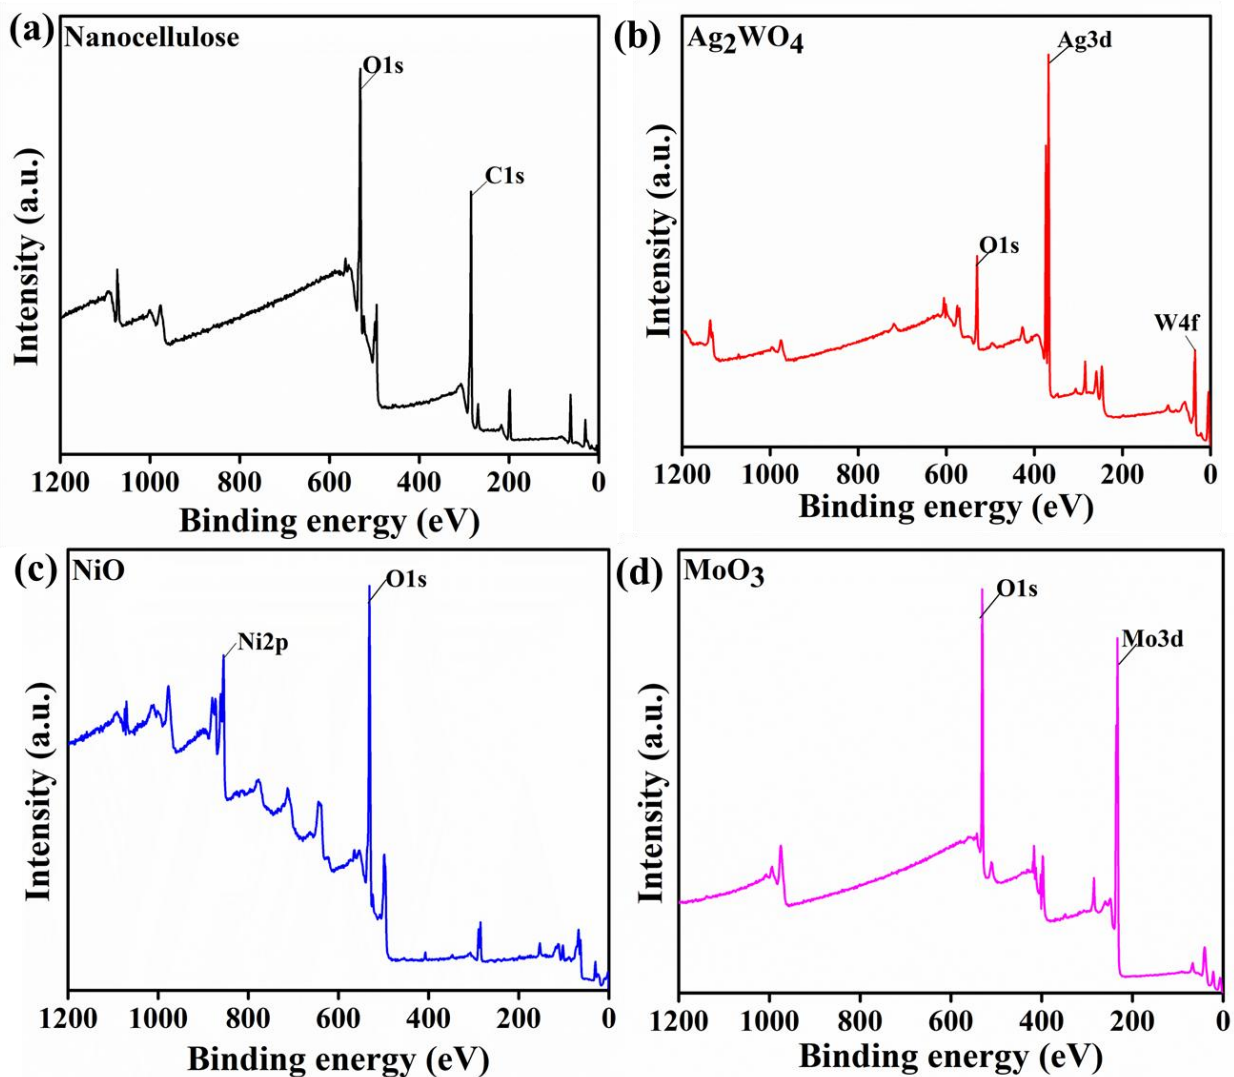

**Figure S4.** XPS survey of (a) nanocellulose, (b)  $\text{Ag}_2\text{WO}_4$ , (c) NiO, and (d)  $\text{MoO}_3$ .

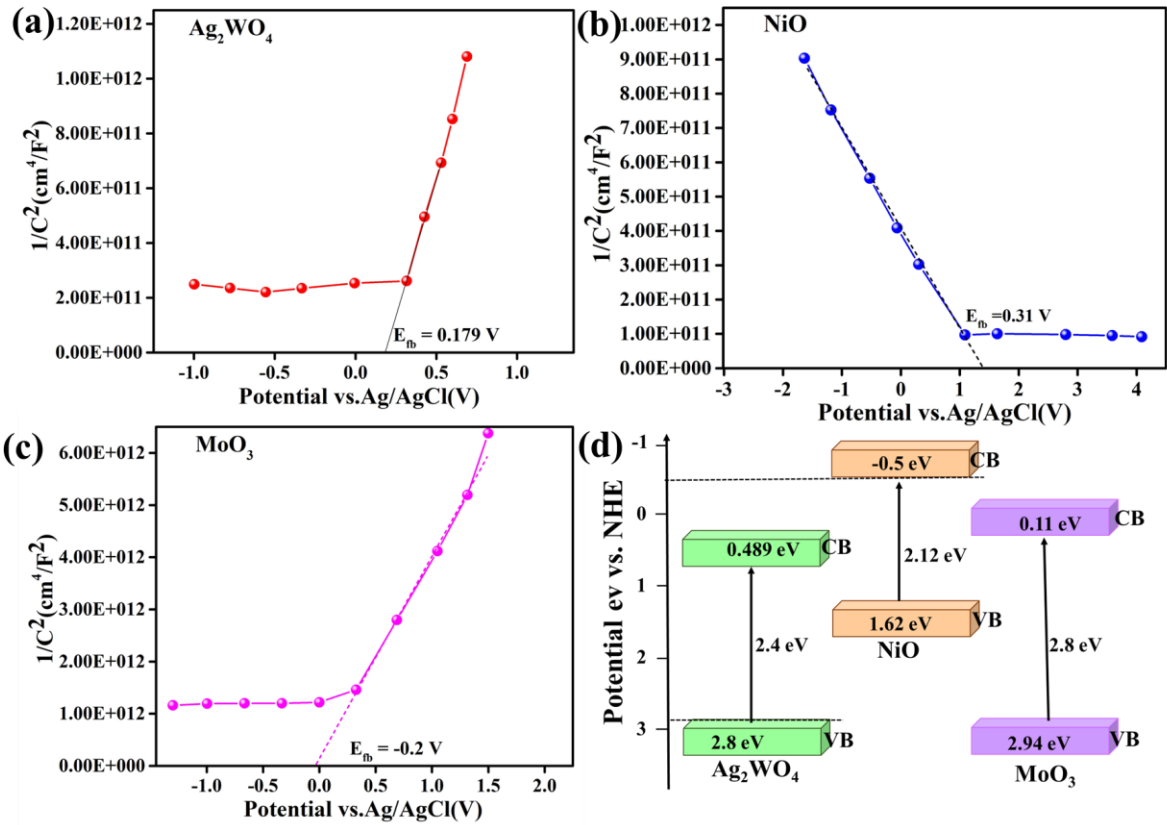

**Figure S5.** Mott-Schottky plots for bare (a) n-type  $\text{Ag}_2\text{WO}_4$ , (b) p-type  $\text{NiO}$ , (c) n-type  $\text{MoO}_3$ , and (d) Band structure of ANM heterojunction.

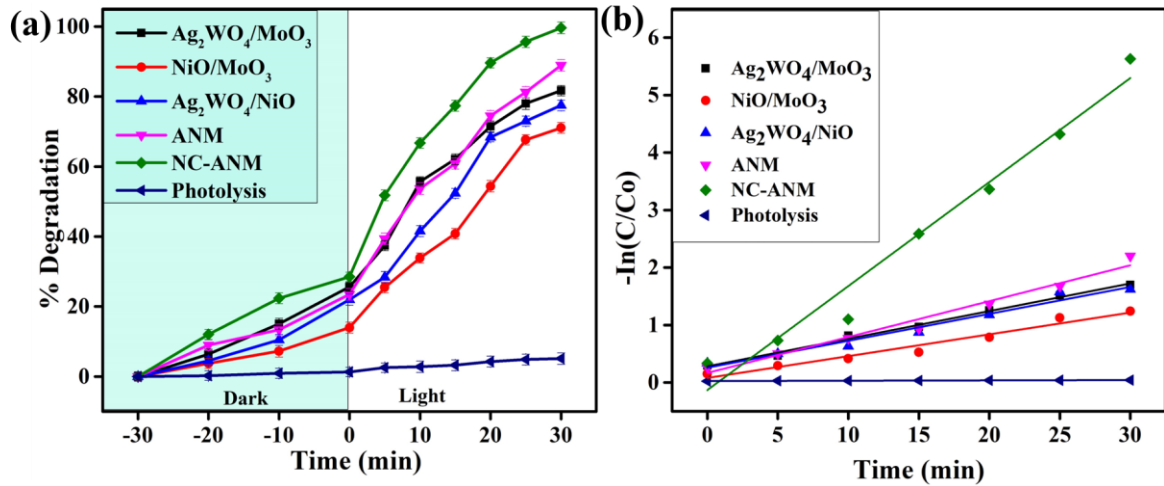

**Figures S6.** (a) Degradation percentage for binary heterojunction in possible combination and NC-ANM heterojunction, and (b) The kinetic analysis indicates that the reaction follows a pseudo-first-order model where NC-ANM heterojunction exhibits the highest rate constant.



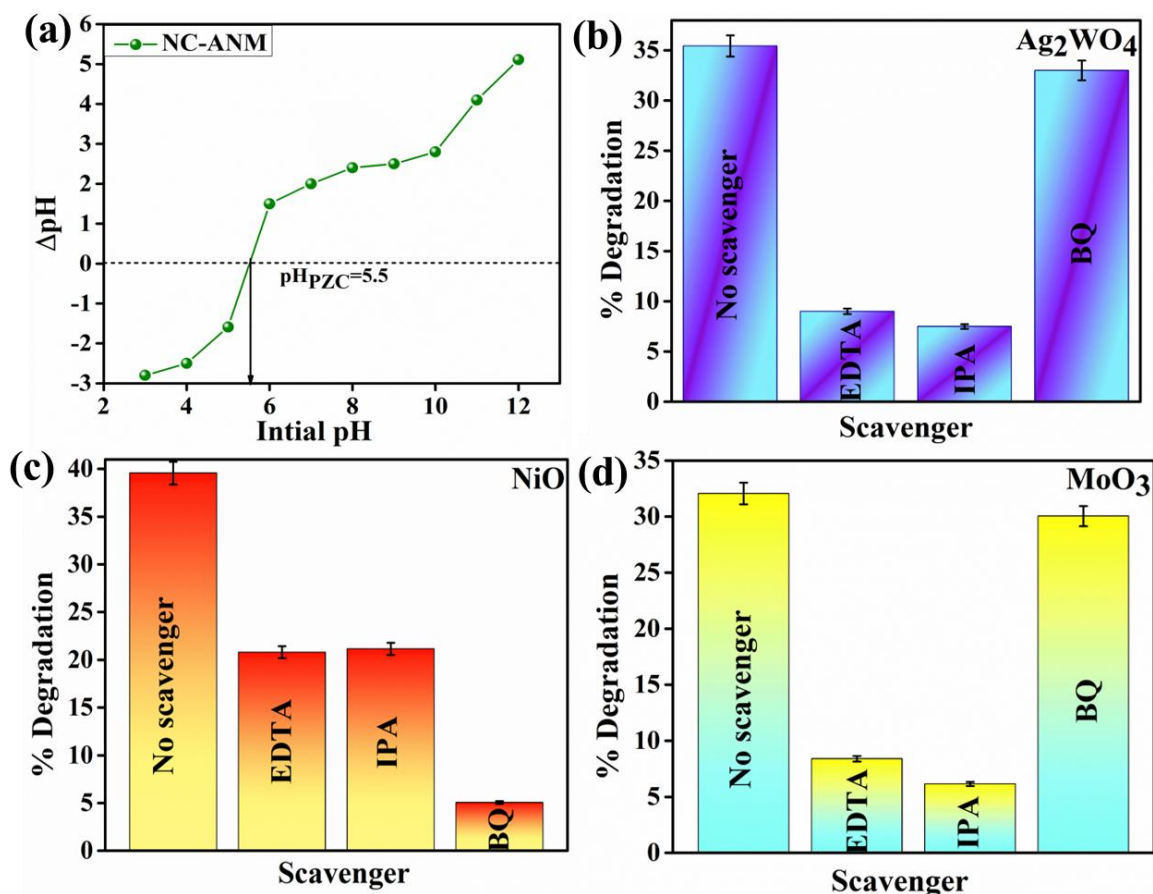

**Figure S7.** (a) Zero-point charge of NC-ANM heterojunction, (b) Trapping experiment for photodegradation of NFX using bare  $\text{Ag}_2\text{WO}_4$ , (c) NiO, and (d)  $\text{MoO}_3$ .

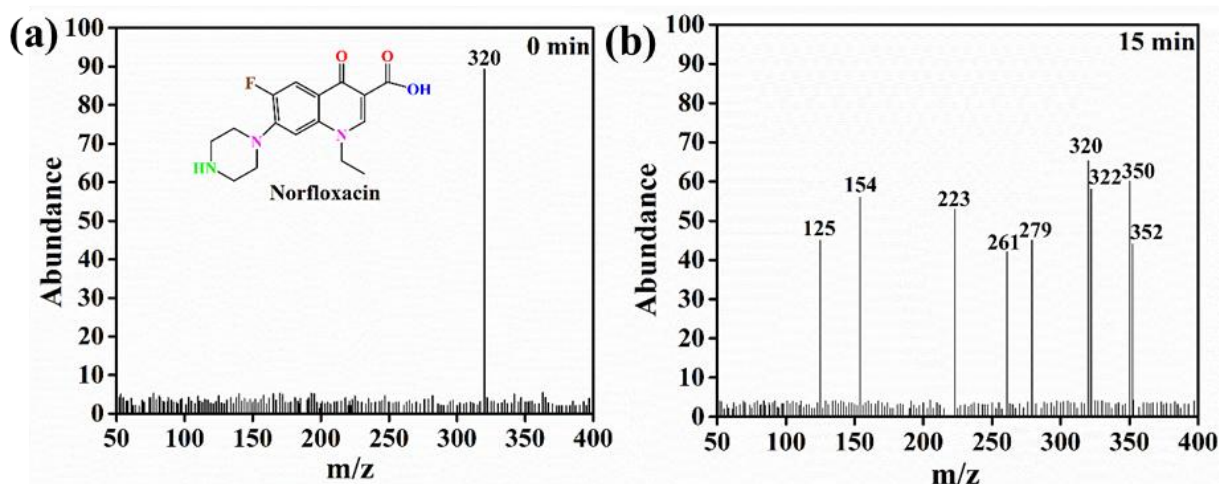

**Figure S8.** Liquid chromatography-mass spectrometry (LC-MS) chromatograms of NFX degradation at (a) time = 0 mins, and (b) time = 15 mins.

## References

1. Gogoi, J. and D. Chowdhury, *Photodegradation of emerging contaminant tetracycline using a zinc titanate nanocellulose composite as an efficient photocatalyst*. *Materials Advances*, 2023. **4**(9): p. 2088-2098.
2. Helmiyati, H., et al., *Green hybrid photocatalyst containing cellulose and  $\gamma$ -Fe<sub>2</sub>O<sub>3</sub>-ZrO<sub>2</sub> heterojunction for improved visible-light driven degradation of Congo red*. *Optical Materials*, 2022. **124**: p. 111982.
3. Sun, Y., et al., *Efficient removal of lomefloxacin by Z-scheme MrGO/Ag<sub>2</sub>WO<sub>4</sub> heterojunction recyclable composite under visible light: Mechanism of adsorption and photodegradation*. *Journal of Environmental Chemical Engineering*, 2022. **10**(1): p. 107120.
4. Mohammed, R.O., et al., *Enhanced photocatalytic degradation activity of ZIF-8 doped with Ag<sub>2</sub>WO<sub>4</sub> photocatalyst*. *Journal of the Taiwan Institute of Chemical Engineers*, 2023. **151**: p. 105141.
5. Fu, S., et al., *Facile fabrication of Z-scheme Ag<sub>2</sub>WO<sub>4</sub>/BiOBr heterostructure with oxygen vacancies for improved visible-light photocatalytic performance*. *Journal of Science: Advanced Materials and Devices*, 2023. **8**(2): p. 100561.
6. Jabbar, Z.H., et al., *Photocatalytic destruction of Congo red dye in wastewater using a novel Ag<sub>2</sub>WO<sub>4</sub>/Bi<sub>2</sub>S<sub>3</sub> nanocomposite decorated g-C<sub>3</sub>N<sub>4</sub> nanosheet as ternary S-scheme heterojunction: Improving the charge transfer efficiency*. *Diamond and Related Materials*, 2023. **133**: p. 109711.
7. Liao, Y., et al., *A novel g-C<sub>3</sub>N<sub>4</sub>/BiOI/Ag<sub>2</sub>WO<sub>4</sub> heterojunction for efficient degradation of organic pollutants under visible light irradiation*. *Ceramics International*, 2021. **47**(18): p. 26248-26259.
8. Nandisha, P. and S. Yallappa, *Synthesis and characterization of ternary NiO@Bi<sub>2</sub>MoO<sub>6</sub>-MoS heterojunction with enhanced photodegradation efficiency towards indigo carmine dye*. *Solid State Sciences*, 2023. **139**: p. 107157.
9. Hu, X., et al., *Step-scheme NiO/BiOI heterojunction photocatalyst for rhodamine photodegradation*. *Applied Surface Science*, 2020. **511**: p. 145499.
10. Dong, J., et al., *Construction of Z-scheme NiO/BiOBr heterojunction for facilitating photocatalytic degradation of oxytetracycline and 2-mercaptobenzothiazole*. *Journal of Alloys and Compounds*, 2024. **976**: p. 172920.

11. Li, Z., et al., *Bi-functional S-scheme S-Bi<sub>2</sub>WO<sub>6</sub>/NiO heterojunction for photocatalytic ciprofloxacin degradation and CO<sub>2</sub> reduction: Mechanisms and pathways*. Separation and Purification Technology, 2023. **310**: p. 123197.
12. Liu, Y., et al., *Stable photodegradation of antibiotics by the functionalized 3D-Bi<sub>2</sub>MoO<sub>6</sub>@ MoO<sub>3</sub>/PU composite sponge: High efficiency pathways, optical properties and Z-scheme heterojunction mechanism*. Chemosphere, 2023. **332**: p. 138911.
13. Ouyang, C., et al., *Direct Z-scheme ZnIn<sub>2</sub>S<sub>4</sub>@ MoO<sub>3</sub> heterojunction for efficient photodegradation of tetracycline hydrochloride under visible light irradiation*. Chemical Engineering Journal, 2021. **424**: p. 130510.
14. Hussain, M.K., et al., *Enhanced visible light-driven photocatalytic activity and stability of novel ternary ZnO/CuO/MoO<sub>3</sub> nanorods for the degradation of rhodamine B and alizarin yellow*. Materials Science in Semiconductor Processing, 2023. **155**: p. 107261.
15. PARIMALA, L. and J. SANTHANALAKSHMI, *Synthesis, Characterisation and Catalytic Behaviour of NiO Nanoflowers for the Photo Degradation of Norflaxacin in Aqueous Medium*. Chemical Science, 2019. **8**(1): p. 70-76.
16. Huang, Y., et al., *Molybdenum oxide nanorods decorated with molybdenum phosphide quantum dots for efficient photocatalytic degradation of rhodamine B and norfloxacin*. Research on Chemical Intermediates, 2022. **48**(7): p. 2887-2901.
17. Haque, M. and M. Muneer, *Photodegradation of norfloxacin in aqueous suspensions of titanium dioxide*. Journal of Hazardous materials, 2007. **145**(1-2): p. 51-57.
18. Patel, J., A.K. Singh, and S.A. Carabineiro, *Assessing the photocatalytic degradation of fluoroquinolone norfloxacin by Mn: ZnS quantum dots: Kinetic study, degradation pathway and influencing factors*. Nanomaterials, 2020. **10**(5): p. 964.
19. Manasa, M., P.R. Chandewar, and H. Mahalingam, *Photocatalytic degradation of ciprofloxacin & norfloxacin and disinfection studies under solar light using boron & cerium doped TiO<sub>2</sub> catalysts synthesized by green EDTA-citrate method*. Catalysis today, 2021. **375**: p. 522-536.
20. Ji, B., et al., *Immobilized Ag<sub>3</sub>PO<sub>4</sub>/GO on 3D nickel foam and its photocatalytic degradation of norfloxacin antibiotic under visible light*. RSC advances, 2020. **10**(8): p. 4427-4435.

21. Zhu, Z., et al., *Facile Construction of Bi<sub>2</sub>Sn<sub>2</sub>O<sub>7</sub>/g-C<sub>3</sub>N<sub>4</sub> Heterojunction with Enhanced Photocatalytic Degradation of Norfloxacin*. *Inorganics*, 2022. **10**(9): p. 131.
22. Zhang, W., et al., *Boosted photocatalytic degradation of norfloxacin on LaOCl/LDH: Synergistic effect of Z-scheme heterojunction and O vacancies*. *Journal of Environmental Chemical Engineering*, 2022. **10**(3): p. 107812.
23. Meng, X., et al., *Preparation and visible light catalytic degradation of magnetically recyclable ZnFe<sub>2</sub>O<sub>4</sub>/BiOBr flower-like microspheres*. *Journal of Alloys and Compounds*, 2023. **954**: p. 169981.
24. Muthuraj, V., *Superior visible light driven photocatalytic degradation of fluoroquinolone drug norfloxacin over novel NiWO<sub>4</sub> nanorods anchored on g-C<sub>3</sub>N<sub>4</sub> nanosheets*. *Colloids and Surfaces A: Physicochemical and Engineering Aspects*, 2019. **567**: p. 43-54.
25. Yu, H., et al., *Enhanced photocatalytic degradation of norfloxacin under visible light by immobilized and modified In<sub>2</sub>O<sub>3</sub>/TiO<sub>2</sub> photocatalyst facilely synthesized by a novel polymeric precursor method*. *Journal of Materials Science*, 2019. **54**(14): p. 10191-10203.
26. Liu, W., et al., *Synergistic adsorption-photocatalytic degradation effect and norfloxacin mechanism of ZnO/ZnS@ BC under UV-light irradiation*. *Scientific Reports*, 2020. **10**(1): p. 11903.
27. Arunpandian, M., et al., *Visible-Light Induced Degradation of Norfloxacin and Methylene Blue Using Easily Recoverable NiO/ZnO Heterostructures: Analysis of Efficacy, Stability, Reaction Mechanism and Degradation Pathway*. *Journal of Inorganic and Organometallic Polymers and Materials*, 2023: p. 1-14.
28. Adhikari, S., S. Mandal, and D.-H. Kim, *pn Junction catalysis in action: Boosting norfloxacin photodegradation with ZIF-67-based Co<sub>3</sub>O<sub>4</sub> wrapped in MoS<sub>2</sub> with surface functionalized graphene quantum-dot*. *Applied Surface Science*, 2024. **653**: p. 159374.
